# Supplementary material for: Novel prime-boost immune-based therapy inhibiting both hepatitis B and D virus infections
Source: HighWire-hosted journal article supplement (doi:10.1136/gutjnl-2022-327216), 2022-08-17

## Suppl. Figure 1. Characterization of protein constructs by SDS-PAGE and Western blot.

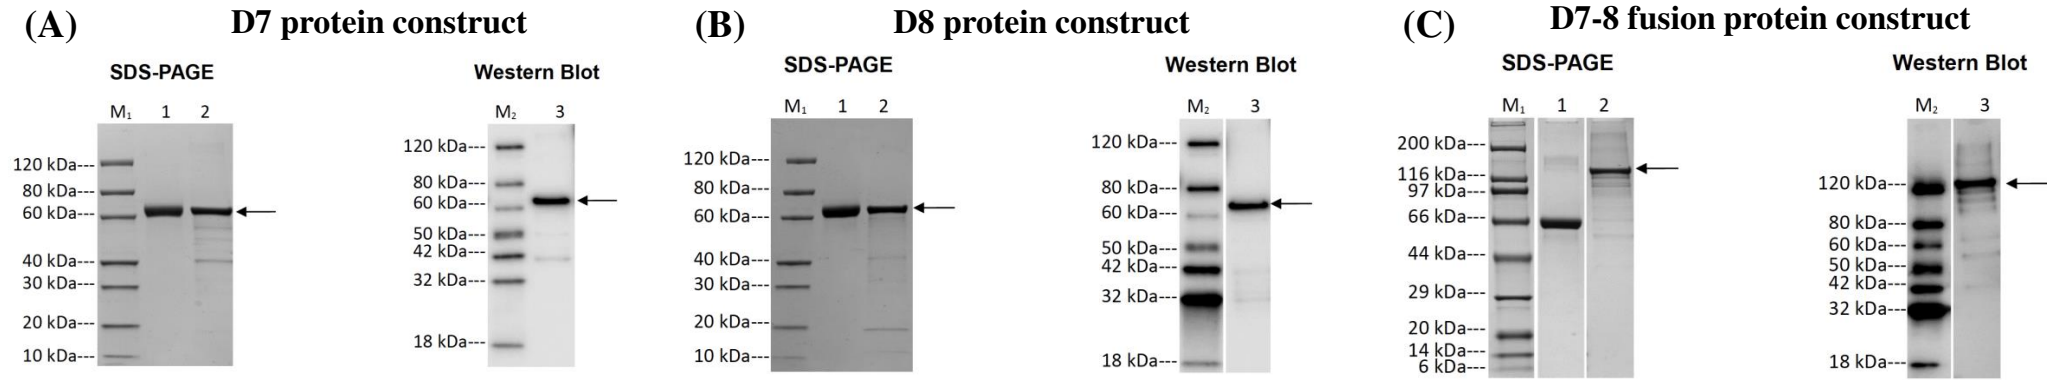

Supplement: gutjnl-2022-327216supp002_data_supplement.pdf [file gutjnl-2022-327216supp002_data_supplement.pdf]
